# Supplementary material
Source: publisher figshare collection journal article supplement (https://sage.figshare.com/ndownloader/files/17398496)

## Appendix 1

### Descriptive statistics

| Indicators          | Mean (M) | Standard Deviation (SD) |
|---------------------|----------|-------------------------|
| CFI1_clean          | 6.25     | 0.718                   |
| CFI2_farming        | 6.14     | 0.751                   |
| CFI3_fishery        | 6.16     | 0.743                   |
| CFI4_coo            | 5.85     | 0.856                   |
| CFI5_abundance      | 5.91     | 0.942                   |
| CFI6_history        | 5.91     | 0.927                   |
| CFI7_local          | 6.08     | 0.734                   |
| CFI8_eating         | 5.78     | 0.870                   |
| CFI9_dish           | 5.93     | 0.862                   |
| CFI10_multicultural | 5.80     | 0.895                   |
| CFI11_unique        | 6.08     | 0.722                   |
| CFI12_varietyfoods  | 6.00     | 0.836                   |
| CFI13_cuisine       | 5.77     | 0.892                   |
| CFI14_aesthetic     | 6.07     | 0.711                   |
| CFI15_religious     | 5.37     | 0.987                   |
| CFI16_exotic        | 6.15     | 0.747                   |
| CFI17_appealing     | 6.08     | 0.750                   |
| CFI18_wellknown     | 5.64     | 0.952                   |
| CFI19_lifestyle     | 5.92     | 0.893                   |
| CFI20_status        | 5.22     | 1.133                   |
| CFI21_chef          | 5.79     | 0.882                   |
| CFI22_friendly      | 6.08     | 0.748                   |
| CFI23_tasty         | 5.92     | 0.860                   |
| CFI24_quality       | 6.05     | 0.702                   |
| CFI25_safety        | 6.12     | 0.737                   |
| CFI26_healthy       | 6.08     | 0.706                   |
| CFI27_digestable    | 5.52     | 0.978                   |
| CFI28_fresh         | 6.27     | 0.727                   |
| CFI29_price         | 5.33     | 0.903                   |
| CFI30_varietyplaces | 5.90     | 0.803                   |
| CFI31_view          | 6.16     | 0.717                   |
| CFI32_street        | 5.66     | 0.935                   |
| CFI33_market        | 6.02     | 0.707                   |
| CFI34_menu          | 5.33     | 0.977                   |
| CFI35_staff         | 5.83     | 0.864                   |
| CFI36_access        | 5.63     | 0.931                   |
| CFI37_restaurant    | 6.03     | 0.720                   |
| CFI38_tour          | 5.97     | 0.870                   |
| CFI39_cooking       | 5.47     | 0.948                   |
| CFI40_festival      | 5.85     | 0.848                   |
| AFI1_excited        | 6.14     | 0.754                   |
| AFI2_satisfied      | 6.27     | 0.677                   |

|                                                               |      |       |
|---------------------------------------------------------------|------|-------|
| AFI3_aroused                                                  | 5.92 | 0.886 |
| AFI4_enjoyable                                                | 6.35 | 0.689 |
| AFI5_fun                                                      | 6.24 | 0.728 |
| AFI6_pleasant                                                 | 6.31 | 0.699 |
| AFI7_good                                                     | 6.18 | 0.694 |
| AFI8_relax                                                    | 6.24 | 0.708 |
| INT1_destination                                              | 5.89 | 0.950 |
| INT2_food                                                     | 5.84 | 0.974 |
| INT3_taste                                                    | 6.24 | 0.731 |
| INT4_eat                                                      | 6.29 | 0.715 |
| INT5_recommend                                                | 6.08 | 0.724 |
| Neophobia1_ At dinner parties, I will try new foods           | 6.11 | 0.810 |
| Neophobia2_ I like foods from different culture               | 6.23 | 0.813 |
| Neophobia3_ I am afraid to eat things I have never had before | 4.98 | 1.713 |
| Neophobia4_ I am constantly sampling new and different foods  | 5.82 | 1.035 |
| Neophobia5_ If I don't know what a food is, I won't try it    | 4.88 | 1.707 |
| Neophobia6_ I like to try new ethnic restaurant               | 6.06 | 0.868 |

Note: n = 500. Seven-point Likert scale from 1 = strongly disagree to 7 = strongly agree

## Appendix 2

### Food and cuisine image of Australia: Dimensions and attributes

Sources: adapted from Lai, Khoo-Lattimore, and Wang (2018)

| Dimension                           | Food image attributes from the literature | Australia's food image attributes                                                                                                                               |
|-------------------------------------|-------------------------------------------|-----------------------------------------------------------------------------------------------------------------------------------------------------------------|
| Place/<br>geographic<br>environment | - Geography                               | Australia offers a <b>natural and clean environment</b> for food production.                                                                                    |
|                                     | - Farming/land                            | Australia's <b>farming and agriculture</b> industries are well developed, using advanced farming and agricultural practices in producing quality food products. |
|                                     | - Fishery/sea                             | Australia's <b>fishery industry</b> is well developed, using advanced aquaculture practices in producing quality seafood.                                       |
|                                     | - Provenance/origin of food               | Australia's <b>country of origin</b> symbol and <b>'Made in Australia'</b> food labelling are well recognized.                                                  |
|                                     | - Local food production                   | Australia offers an <b>abundance</b> of food production all year round.                                                                                         |
| Food and<br>cuisine<br>culture      | - Heritage                                | Australia has its own <b>unique food history, tradition and culture</b> .                                                                                       |
|                                     | - Local food culture                      | Australia offers an attractive <b>local food culture</b> .                                                                                                      |
|                                     | - Different style of eating               | Australia offers <b>different styles of eating</b> (e.g., eating Western food with knife and fork, and eating Chinese food with chopsticks).                    |
|                                     | - Local dishes/cuisine                    | Australia offers <b>local dishes and local cuisine</b> with a true local flavor.                                                                                |
|                                     | - Diverse culture                         | Australia offers <b>multicultural</b> food and cuisine from across the globe.                                                                                   |
|                                     | - Food uniqueness                         | Australia offers <b>unique food</b> , using ingredients and cuisine styles unique to Australia.                                                                 |
|                                     | - Variety                                 | Australia offers a <b>wide variety</b> of foods and dishes.                                                                                                     |
|                                     | - Cooking methods                         | Australia offers unique Australian <b>cuisine</b> that embraces multiculturalism and creativity.                                                                |
|                                     | - Aesthetic appeal                        | Australian has <b>aesthetically</b> -pleasing food presentation.                                                                                                |
|                                     | - Religion                                | Australia offers a variety of halal, kosher and vegetarian dishes, codified by <b>religions</b> .                                                               |
|                                     | - Food authenticity/exotic                | Australia offers <b>authentic/exotic</b> food using native ingredients such as kangaroo, and crocodile meat).                                                   |
|                                     | - Food attractiveness                     | Australian food looks <b>attractive, palatable, and appealing</b> .                                                                                             |
|                                     | - Well-known food/cuisine                 | Australian food and cuisine are <b>well-known</b> and internationally recognized.                                                                               |
| Food and<br>people                  | - Local lifestyle                         | Australians offers a compelling <b>lifestyle and food culture</b> (e.g., Australian barbecue culture).                                                          |
|                                     | - Social status                           | Australian prestigious foods and cuisine express eating habits of a <b>higher social class</b> .                                                                |
|                                     | - Modern/innovative                       | Australia's <b>well-known chefs</b> are talented and innovative.                                                                                                |
|                                     | - Friendly locals                         | Australians are <b>hospitable and friendly</b> people.                                                                                                          |
| Food<br>quality                     | - Sensory quality/tasty                   | Australian food is <b>delicious, colorful, aromatic, and tasty</b> .                                                                                            |
|                                     | - Quality label                           | Australia produces <b>high quality food</b> with food quality labels.                                                                                           |
|                                     | - Safety/hygiene                          | Australia offers a high standard of <b>safety/hygienic food</b> .                                                                                               |
|                                     | - Healthy/nutritious                      | Australia offers <b>healthy and nutritious</b> food.                                                                                                            |
|                                     | - Easily digestible                       | Australia offers light meals that are <b>easily digestible</b> (e.g., a meal with plenty of vegetables and whole grains).                                       |
|                                     | - Organic/natural/fresh                   | Australia offers <b>fresh produce</b> (e.g., fresh fruits, vegetables, seafood and high grade meat).                                                            |
|                                     | - Price value                             | Australia offers <b>reasonable prices</b> for dining out.                                                                                                       |
| Dining<br>places/<br>restaurants    | - Attractive dining places                | Australia offers a <b>variety of dining places</b> .                                                                                                            |
|                                     | - Dining atmosphere                       | Australia offers <b>dining atmosphere</b> with spectacular views.                                                                                               |
|                                     | - Street markets                          | Australia offers attractive <b>street food or street markets</b> that provide local delicacies.                                                                 |
|                                     | - Farmers' markets                        | Australia offers attractive <b>farmers' markets</b> that provide farm-direct fresh produce and street food.                                                     |
|                                     | - Menu in other languages                 | Australia offers restaurant <b>menus in Chinese languages</b> .                                                                                                 |
|                                     | - Friendly service staff                  | Australia offers <b>friendly service</b> personnel.                                                                                                             |
|                                     | - Easy access                             | Australia offers <b>easy access</b> to restaurants (e.g., convenient transportation, clear directories, and maps).                                              |
|                                     | - Variety of restaurants                  | Australia offers a <b>variety of restaurants</b> (e.g., upscale, and local/casual).                                                                             |
| Food<br>activities                  | - Food/gourmet tours                      | Australia offers a variety of <b>food/gourmet tours</b> for cultural experiences.                                                                               |
|                                     | - Cooking classes                         | Australia offers <b>cooking classes</b> . Tourists will cook with local chefs and learn how to cook local dishes.                                               |

### Appendix 3

#### Measurement model (Outer model)

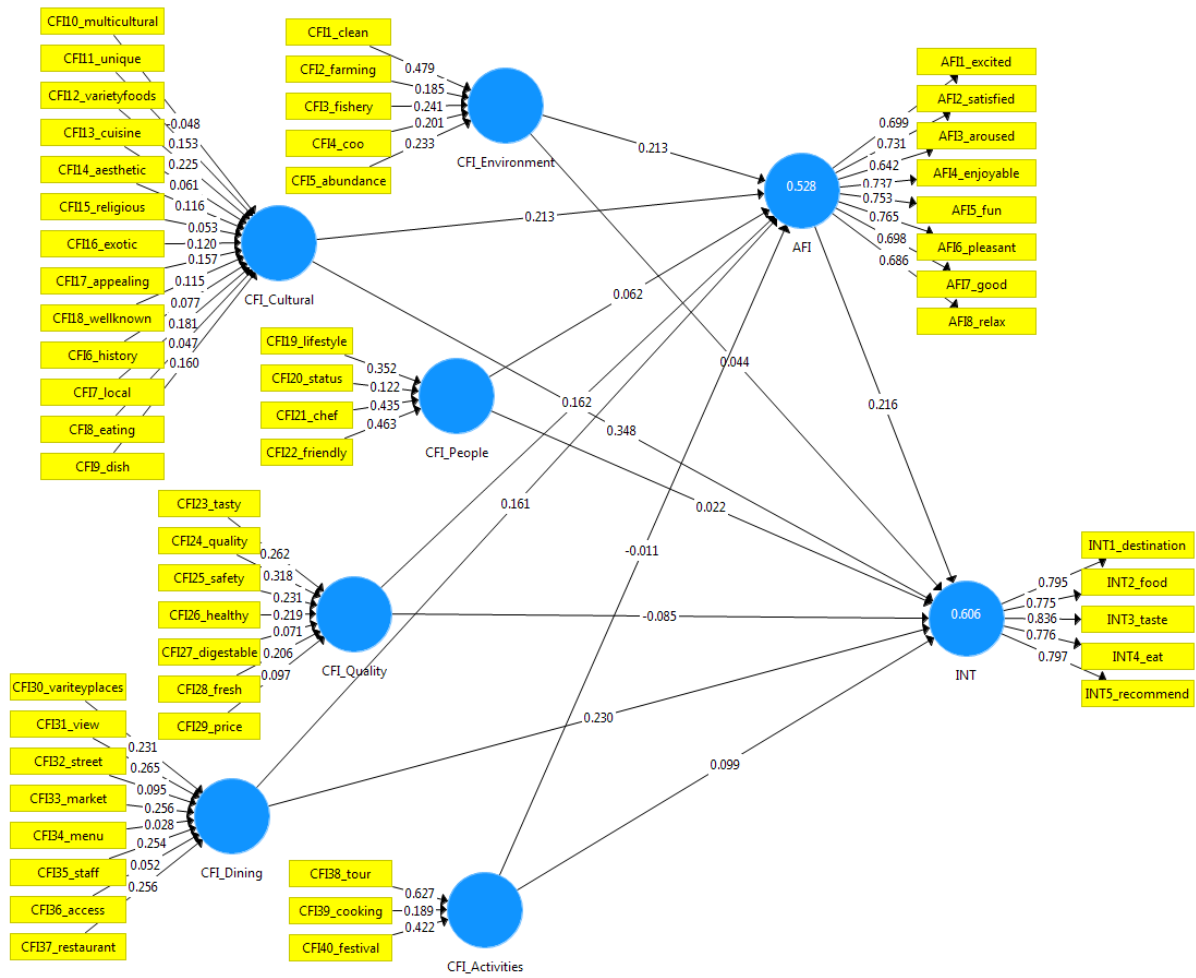

Supplement: Supplementary file 1 [file 17398496]
